# Supplementary material for: Associative learning mediates dynamic shifts in dopamine signaling in the nucleus accumbens
Source: Springer Nature journal article supplement (doi:10.1038/nn1923), 2007-07-01
Supplement: 41593_2007_BFnn1923_MOESM3_ESM.pdf [file 41593_2007_BFnn1923_MOESM3_ESM.pdf]

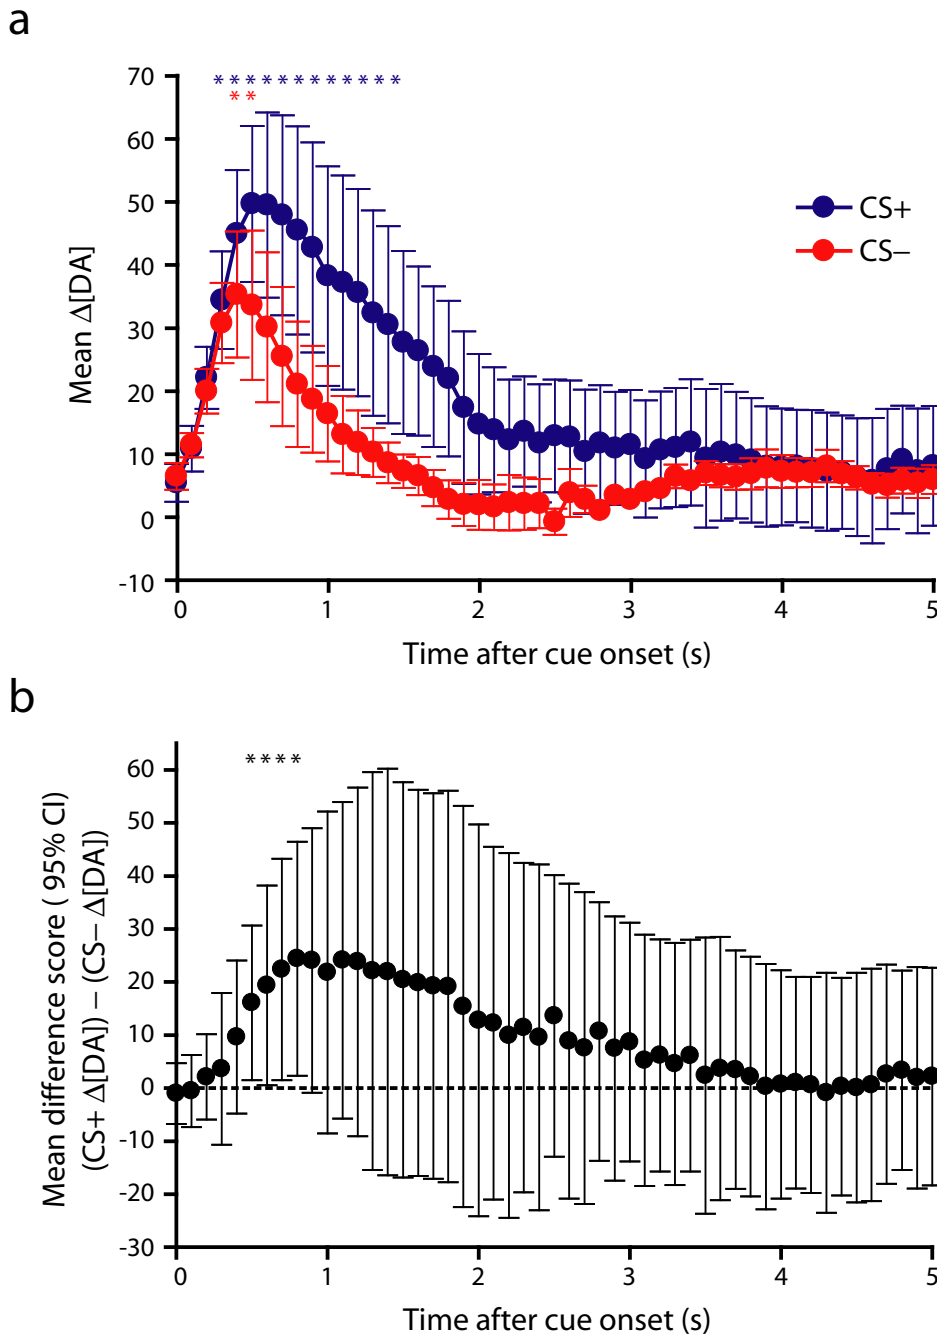

**Supplementary Figure 3.** Cue-evoked dopamine release after extended conditioning. **(a)** Mean differential dopamine concentration for 5 s after CS+ (blue trace) and CS- (red trace) onset. CS+ evoked NAc [DA] was significantly elevated from baseline levels at 0.3–1.4 s after cue onset (blue asterisks;  $p < 0.05$  for each comparison). CS- evoked [DA] was significantly increased from baseline levels at 0.4–0.5 s after cue onset (red asterisks;  $p < 0.05$  for each contrast). **(b)** CS+/CS- difference score ((CS+ [DA]) - (CS- [DA])) during the same time period. CS+ evoked [DA] was significantly higher than CS- evoked [DA] at 0.5–0.8 s after cue onset (\*95% CI does not include zero).
